# Supplementary material for: Pathophysiological Mechanisms by which Heat Stress Potentially Induces Kidney Inflammation and Chronic Kidney Disease in Sugarcane Workers
Source: MDPI journal article supplement (doi:10.3390/nu12061639), 2020-06-02
Supplement: s1 [file s1]

**Supplement Table S1: Background data for Ingenio El Angel, El Salvador.**

Participation data for Ingenio El Angel, El Salvador cohort Year 2 (2015-2016).

|                                                                    | <b>Number of Cutters</b> |     |
|--------------------------------------------------------------------|--------------------------|-----|
| <b>Baseline measurements</b>                                       |                          | 334 |
| Number of serum creatinine measurements during harvest year 2, (N) | 0                        | 75  |
|                                                                    | 1                        | 28  |
|                                                                    | 2                        | 79  |
|                                                                    | 3                        | 152 |

 Descriptive data concerning Ingenio El Angel, El Salvador cohort Year 2 (2015-2016) - Subjects with  $\geq 1$  measurements during harvest.

|                                                           | <b>N</b> | <b>259</b>  |
|-----------------------------------------------------------|----------|-------------|
| Sex, N women (%)                                          |          | 46 (18%)    |
| Age (years), median (IQR)                                 |          | 32 (24–43)  |
| Baseline eGFR (ml/min/1.73 m <sup>2</sup> ), median (IQR) |          | 90 (67–108) |

**Supplement Table S2: Results from women in El Salvador, year 2**

Kidney injury and risk factors among female sugarcane cutters.

| <b>El Salvador</b>                |              |            |
|-----------------------------------|--------------|------------|
| <b>Worker follow-up occasions</b> |              |            |
|                                   | <b>Total</b> | <b>IKI</b> |
| Age                               |              |            |
| 18–30                             | 42           | 0          |
| 31–40                             | 49           | 2 (4%)     |
| 41–50                             | 12           | 0          |
| >50                               | 17           | 5 (29%)    |
| Baseline eGFR                     |              |            |
| >90                               | 54           | 0          |
| 90–60                             | 59           | 5 (8%)     |
| 45–60                             | 7            | 2 (29%)    |
| <45                               | 0            | -          |
| Baseline CRP (mg/L)               |              |            |
| <3                                | 77           | 3 (4%)     |
| 3–10                              | 38           | 4 (11%)    |
| 10–20                             | 5            | 0          |
| >20                               | 0            | -          |
| Follow-up CRP (mg/L)              |              |            |
| <3                                | 62           | 1 (2%)     |
| 3–10                              | 48           | 4 (8%)     |
| 10–20                             | 6            | 0          |
| >20                               | 4            | 2 (50%)    |
| Baseline Mg (mmol/L)              |              |            |
| ≥0.7                              | 112          | 5 (4%)     |
| <0.7                              | 8            | 2 (25%)    |
| Baseline K                        |              |            |
| ≥3.5                              | 118          | 7 (6%)     |
| <3.5                              | 2            | 0          |
| Follow-up K                       |              |            |
| ≥3.5                              | 109          | 5 (5%)     |
| <3.5                              | 11           | 2 (2%)     |

Kidney injury and continuous biochemical parameters in female sugarcane cutters.

|             |        | Baseline      | Median (IQR)<br>Non IKI Day | IKI Day       |
|-------------|--------|---------------|-----------------------------|---------------|
| Worker-days | N      | 46            | 113                         | 7             |
| CRP         | mg/dL  | 1.6 (0.9–4.0) | 2.8 (1.5–5.7)               | 6.0 (3.8–28)  |
| Uric acid   | mmol/L | 279 (215–332) | 265 (219–308)               | 370 (388–434) |
| CPK         | μkat/L | 1.6 (1.2–1.9) | 2.2 (1.8–2.8)               | 3.1 (2.1–5.3) |

Supplement Table S3: Multivariate regression analyses

| Nicaragua (Adelante Cohort)                 |     |                               |                                       |                                               |                                                              |
|---------------------------------------------|-----|-------------------------------|---------------------------------------|-----------------------------------------------|--------------------------------------------------------------|
| Worker-harvests                             |     |                               |                                       |                                               |                                                              |
| Total                                       | IKI | Incidence Ratio (IR) (95% CI) | IR Adjusted for Job and Year (95% CI) | IR Adjusted for NSAID, CRP and Fever (95% CI) | IR Adjusted for Sugary Drink, Water and Boli Intake (95% CI) |
| Age (years)                                 |     |                               |                                       |                                               |                                                              |
| 18-30                                       | 320 | 32 (10%)                      | ref                                   | Ref                                           |                                                              |
| 31-40                                       | 155 | 16 (10%)                      | 1.0 (0.6–1.9)                         | 0.9 (0.5–1.7)                                 |                                                              |
| 41-50                                       | 43  | 5 (12%)                       | 1.2 (0.5–3.0)                         | 1.0 (0.4–2.7)                                 |                                                              |
| >50                                         | 14  | 0 (0%)                        | NA                                    | NA                                            |                                                              |
| eGFR, baseline (mL/min/1.73m <sup>2</sup> ) |     |                               |                                       |                                               |                                                              |
| >90                                         | 358 | 29 (8%)                       | Ref                                   | Ref                                           |                                                              |
| 90-60                                       | 163 | 23 (14%)                      | 1.7 (1.0–3.0)                         | 1.5 (0.9–2.6)                                 |                                                              |
| 45-60                                       | 10  | 1 (10%)                       | 1.2 (0.2–9.1)                         | 1.0 (0.1–7.7)                                 |                                                              |
| <45                                         | 1   | 0 (0%)                        | NA                                    | NA                                            |                                                              |
| CRP, baseline (mg/L)                        |     |                               |                                       |                                               |                                                              |
| <3                                          | 423 | 40 (9%)                       | Ref                                   | Ref                                           |                                                              |
| 3-10                                        | 85  | 12 (14%)                      | 1.5 (0.8–2.8)                         | 1.5 (0.8–2.8)                                 |                                                              |
| 10-20                                       | 12  | 0 (0%)                        | NA                                    | NA                                            |                                                              |
| >20                                         | 12  | 1 (8%)                        | 0.9 (0.1–6.4)                         | 1.1 (0.1–7.9)                                 |                                                              |
| CRP, follow-up (mg/L)                       |     |                               |                                       |                                               |                                                              |
| <3                                          | 340 | 10 (3%)                       | Ref                                   | Ref                                           | Ref                                                          |
| 3-10                                        | 142 | 14 (10%)                      | 3.4 (1.5–7.5)                         | 2.8 (1.2–6.4)                                 | 3.5 (1.5–8.2)                                                |
| 10-20                                       | 24  | 9 (38%)                       | 13 (5–31)                             | 11 (4.5–28)                                   | 12 (5–31)                                                    |
| >20                                         | 26  | 20 (77%)                      | 26 (12–56)                            | 21 (10–45)                                    | 26 (12–60)                                                   |
| NSAID use at least once per week†           |     |                               |                                       |                                               |                                                              |
| No                                          | 444 | 37 (8%)                       | Ref                                   | Ref                                           | Ref                                                          |
| Yes                                         | 88  | 16 (18%)                      | 2.2 (1.2–3.9)                         | 1.8 (1.0–3.3)                                 | 2.0 (1.1–3.7)                                                |
| Incident fever in past week(s) ††           |     |                               |                                       |                                               |                                                              |
| No                                          | 463 | 40 (9%)                       | Ref                                   | Ref                                           | Ref                                                          |
| Yes                                         | 43  | 11 (26%)                      | 3.0 (1.5–5.8)                         | 2.7 (1.4–5.3)                                 | 1.1 (0.5–2.2)                                                |

| Sugary drink intake (L)                               |     |          |               |               |               |
|-------------------------------------------------------|-----|----------|---------------|---------------|---------------|
| <0.2                                                  | 64  | 2 (3%)   | Ref           | Ref           | Ref           |
| 0.2–1                                                 | 312 | 30 (10%) | 3.1 (0.7–13)  | 3.3 (0.8–14)  | 3.0 (0.7–12)  |
| >1                                                    | 155 | 21 (14%) | 4.3 (1.0–18)  | 4.6 (1.1–20)  | 4.0 (0.9–17)  |
| Morning boli intake (N of 300 mL electrolyte sachets) |     |          |               |               |               |
| 0                                                     | 125 | 18 (14%) | Ref           | Ref           | Ref           |
| 0–3                                                   | 214 | 23 (11%) | 0.7 (0.4–1.4) | 0.8 (0.4–1.4) | 0.8 (0.4–1.6) |
| ≥3                                                    | 180 | 12 (7%)  | 0.4 (0.2–0.9) | 0.5 (0.2–1.1) | 0.5 (0.2–1.1) |
| Morning water intake (L)                              |     |          |               |               |               |
| 0–2                                                   | 76  | 12 (16%) | Ref           | Ref           | Ref           |
| 2–5                                                   | 209 | 18 (9%)  | 0.5 (0.3–1.1) | 0.6 (0.3–1.2) | 0.7 (0.3–1.5) |
| >5                                                    | 246 | 23 (9%)  | 0.6 (0.3–1.2) | 0.8 (0.4–1.7) | 0.9 (0.4–2.0) |

Job: seed cutter and burned cane cutter. Year: 2017–2018 and 2018–2019. NSAID: Non-steroidal anti-inflammatory drugs. CRP: C-reactive protein.
